# Supplementary material for: Time Evolution of the Symmetry of Alphabet Symbols and Its Quantification: Study in the Archeology of Symmetry
Source: MDPI journal article supplement (doi:10.3390/sym16040465), 2024-04-11
Supplement: s1 [file s1]

# Time evolution of the symmetry of alphabet symbols and its quantification: study in the archeology of symmetry

Artem Gilevich<sup>1</sup>, Mark Frenkel<sup>1</sup>, Shraga Shoval<sup>2</sup>, Edward Bormashenko<sup>\*2</sup>

<sup>1</sup> Department of Chemical Engineering, Ariel University, Ariel, POB 3, 407000, Israel

<sup>2</sup> Department of Industrial Engineering and Management, Faculty of Engineering, Ariel University, P.O.B. 3, Ariel 407000, Israel

\* Correspondence: [edward@ariel.ac.il](mailto:edward@ariel.ac.il)

Schoenflies scheme notation:

identity transformation ( $C_1$ ),

horizontal mirror axis ( $S_1$ )

vertical mirror axis ( $S_2$ )

diagonal mirror axes ( $S_3$ ,  $S_4$ )

rotation on  $180^\circ$  ( $C_2$ )

4-fold rotational symmetry ( $C_4$ ,  $C_2$ ,  $C_4^3$ )

| Archaic Western Greek |       |       |       |       |       |       |       |         |
|-----------------------|-------|-------|-------|-------|-------|-------|-------|---------|
| Script                | $C_1$ | $S_1$ | $S_2$ | $S_3$ | $S_4$ | $C_4$ | $C_2$ | $C_4^3$ |
| Α                     | 1     | 0     | 0     | 0     | 0     | 0     | 0     | 0       |
| Β                     | 1     | 1     | 0     | 0     | 0     | 0     | 0     | 0       |
| Γ                     | 1     | 0     | 0     | 0     | 0     | 0     | 0     | 0       |
| Δ                     | 1     | 0     | 0     | 0     | 0     | 0     | 0     | 0       |
| Ε                     | 1     | 0     | 0     | 0     | 0     | 0     | 0     | 0       |
| Ζ                     | 1     | 0     | 0     | 0     | 0     | 0     | 0     | 0       |
| Η                     | 1     | 1     | 1     | 0     | 0     | 0     | 1     | 0       |
| Θ                     | 1     | 1     | 1     | 0     | 0     | 0     | 1     | 0       |
| ⊗                     | 1     | 1     | 1     | 1/0   | 1/0   | 1/0   | 1     | 1/0     |
| Ι                     | 1     | 1     | 1     | 0     | 0     | 0     | 1     | 0       |
| Κ                     | 1     | 1     | 0     | 0     | 0     | 0     | 0     | 0       |
| Λ                     | 1     | 0     | 0     | 0     | 0     | 0     | 0     | 0       |
| Μ                     | 1     | 0     | 0     | 0     | 0     | 0     | 0     | 0       |
| Ν                     | 1     | 0     | 0     | 0     | 0     | 0     | 0     | 0       |
| Ο                     | 1     | 1     | 1     | 0     | 0     | 0     | 1     | 0       |
| Π                     | 1     | 0     | 0     | 0     | 0     | 0     | 0     | 0       |
| Ρ                     | 1     | 0     | 1     | 0     | 0     | 0     | 0     | 0       |
| Ϝ                     | 1     | 0     | 1     | 0     | 0     | 0     | 0     | 0       |
| Ϛ                     | 1     | 0     | 0     | 0     | 0     | 0     | 0     | 0       |
| ϛ                     | 1     | 0     | 0     | 0     | 0     | 0     | 0     | 0       |
| Ϝ                     | 1     | 1     | 0     | 0     | 0     | 0     | 0     | 0       |
| Ϛ                     | 1     | 0     | 1     | 0     | 0     | 0     | 0     | 0       |
| ϛ                     | 1     | 0     | 1     | 0     | 0     | 0     | 0     | 0       |
| Υ                     | 1     | 1     | 1     | 1/0   | 1/0   | 1/0   | 1     | 1/0     |
| Χ                     | 1     | 1     | 1     | 0     | 0     | 0     | 1     | 0       |
| Φ                     | 1     | 0     | 1     | 0     | 0     | 0     | 0     | 0       |
| Ψ                     | 1     | 0     | 1     | 0     | 0     | 0     | 0     | 0       |

| Etruscan from Marsiliana |                |                |                |                |                |                |                |                             |
|--------------------------|----------------|----------------|----------------|----------------|----------------|----------------|----------------|-----------------------------|
| Script                   | C <sub>1</sub> | S <sub>1</sub> | S <sub>2</sub> | S <sub>3</sub> | S <sub>4</sub> | C <sub>4</sub> | C <sub>2</sub> | C <sub>4</sub> <sup>3</sup> |
| A                        | 1              | 0              | 1              | 0              | 0              | 0              | 0              | 0                           |
| 𐌠                        | 1              | 1              | 0              | 0              | 0              | 0              | 0              | 0                           |
| )                        | 1              | 1              | 0              | 0              | 0              | 0              | 0              | 0                           |
| 𐌡                        | 1              | 0              | 0              | 0              | 0              | 0              | 0              | 0                           |
| 𐌢                        | 1              | 0              | 0              | 0              | 0              | 0              | 0              | 0                           |
| 𐌣                        | 1              | 0              | 0              | 0              | 0              | 0              | 0              | 0                           |
| I                        | 1              | 1              | 1              | 0              | 0              | 0              | 1              | 0                           |
| 𐌦                        | 1              | 1              | 1              | 0              | 0              | 0              | 1              | 0                           |
| ⊗                        | 1              | 1              | 1              | 1/0            | 1/0            | 1/0            | 1              | 1/0                         |
| 𐌨                        | 1              | 1              | 1              | 0              | 0              | 0              | 1              | 0                           |
| 𐌩                        | 1              | 1              | 0              | 0              | 0              | 0              | 0              | 0                           |
| 𐌪                        | 1              | 0              | 0              | 0              | 0              | 0              | 0              | 0                           |
| 𐌫                        | 1              | 0              | 0              | 0              | 0              | 0              | 0              | 0                           |
| 𐌬                        | 1              | 0              | 0              | 0              | 0              | 0              | 0              | 0                           |
| 𐌭                        | 1              | 0              | 0              | 0              | 0              | 0              | 0              | 0                           |
| 𐌮                        | 1              | 1              | 1              | 1/0            | 1/0            | 1/0            | 1              | 1/0                         |
| O                        | 1              | 1              | 1              | 0              | 0              | 0              | 1              | 0                           |
| 𐌰                        | 1              | 0              | 0              | 0              | 0              | 0              | 0              | 0                           |
| M                        | 1              | 0              | 1              | 0              | 0              | 0              | 0              | 0                           |
| 𐌴                        | 1              | 0              | 1              | 0              | 0              | 0              | 0              | 0                           |
| 𐌵                        | 1              | 0              | 0              | 0              | 0              | 0              | 0              | 0                           |
| 𐌶                        | 1              | 0              | 0              | 0              | 0              | 0              | 1              | 0                           |
| T                        | 1              | 0              | 1              | 0              | 0              | 0              | 0              | 0                           |
| 𐌸                        | 1              | 0              | 0              | 0              | 0              | 0              | 0              | 0                           |
| X                        | 1              | 1              | 1              | 1/0            | 1/0            | 1/0            | 1              | 1/0                         |
| 𐌺                        | 1              | 0              | 1              | 0              | 0              | 0              | 0              | 0                           |
| 𐌻                        | 1              | 0              | 1              | 0              | 0              | 0              | 0              | 0                           |

| Archaic Etruscan |                |                |                |                |                |                |                |                             |
|------------------|----------------|----------------|----------------|----------------|----------------|----------------|----------------|-----------------------------|
| Scri<br>pt       | C <sub>1</sub> | S <sub>1</sub> | S <sub>2</sub> | S <sub>3</sub> | S <sub>4</sub> | C <sub>4</sub> | C <sub>2</sub> | C <sub>4</sub> <sup>3</sup> |
| A                | 1              | 0              | 1              | 0              | 0              | 0              | 0              | 0                           |
| )                | 1              | 1              | 0              | 0              | 0              | 0              | 0              | 0                           |
| 𐌢                | 1              | 0              | 0              | 0              | 0              | 0              | 0              | 0                           |
| 𐌣                | 1              | 0              | 0              | 0              | 0              | 0              | 0              | 0                           |
| I                | 1              | 1              | 1              | 0              | 0              | 0              | 1              | 0                           |
| 𐌦                | 1              | 1              | 1              | 0              | 0              | 0              | 1              | 0                           |
| ⊗                | 1              | 1              | 1              | 1/0            | 1/0            | 1/0            | 1              | 1/0                         |
| 𐌨                | 1              | 1              | 1              | 0              | 0              | 0              | 1              | 0                           |
| 𐌩                | 1              | 1              | 0              | 0              | 0              | 0              | 0              | 0                           |
| 𐌪                | 1              | 0              | 0              | 0              | 0              | 0              | 0              | 0                           |
| 𐌫                | 1              | 0              | 0              | 0              | 0              | 0              | 0              | 0                           |
| 𐌬                | 1              | 0              | 0              | 0              | 0              | 0              | 0              | 0                           |
| 𐌭                | 1              | 0              | 0              | 0              | 0              | 0              | 0              | 0                           |
| 𐌮                | 1              | 0              | 1              | 0              | 0              | 0              | 0              | 0                           |
| 𐌴                | 1              | 0              | 1              | 0              | 0              | 0              | 0              | 0                           |
| 𐌵                | 1              | 0              | 0              | 0              | 0              | 0              | 0              | 0                           |
| 𐌶                | 1              | 0              | 0              | 0              | 0              | 0              | 1              | 0                           |
| T                | 1              | 0              | 1              | 0              | 0              | 0              | 0              | 0                           |
| 𐌸                | 1              | 0              | 0              | 0              | 0              | 0              | 0              | 0                           |
| X                | 1              | 1              | 1              | 1/0            | 1/0            | 1/0            | 1              | 1/0                         |
| 𐌺                | 1              | 0              | 1              | 0              | 0              | 0              | 0              | 0                           |
| 𐌻                | 1              | 0              | 1              | 0              | 0              | 0              | 0              | 0                           |
| 8                | 1              | 1              | 1              | 0              | 0              | 0              | 1              | 0                           |

| Neo-Etruscan |                |                |                |                |                |                |                |                             |
|--------------|----------------|----------------|----------------|----------------|----------------|----------------|----------------|-----------------------------|
| Script       | C <sub>1</sub> | S <sub>1</sub> | S <sub>2</sub> | S <sub>3</sub> | S <sub>4</sub> | C <sub>4</sub> | C <sub>2</sub> | C <sub>4</sub> <sup>3</sup> |
| 𐌀            | 1              | 0              | 1              | 0              | 0              | 0              | 0              | 0                           |
| 𐌁            | 1              | 1              | 0              | 0              | 0              | 0              | 0              | 0                           |
| 𐌂            | 1              | 0              | 0              | 0              | 0              | 0              | 0              | 0                           |
| 𐌃            | 1              | 0              | 0              | 0              | 0              | 0              | 0              | 0                           |
| 𐌄            | 1              | 1              | 1              | 0              | 0              | 0              | 1              | 0                           |
| 𐌅            | 1              | 1              | 1              | 0              | 0              | 0              | 1              | 0                           |
| 𐌆            | 1              | 1              | 1              | 0              | 0              | 0              | 1              | 0                           |
| 𐌇            | 1              | 1              | 1              | 0              | 0              | 0              | 1              | 0                           |
| 𐌈            | 1              | 0              | 0              | 0              | 0              | 0              | 0              | 0                           |
| 𐌉            | 1              | 0              | 0              | 0              | 0              | 0              | 0              | 0                           |
| 𐌊            | 1              | 0              | 0              | 0              | 0              | 0              | 0              | 0                           |
| 𐌋            | 1              | 0              | 0              | 0              | 0              | 0              | 0              | 0                           |
| 𐌌            | 1              | 0              | 0              | 0              | 0              | 0              | 0              | 0                           |
| 𐌍            | 1              | 0              | 1              | 0              | 0              | 0              | 0              | 0                           |
| 𐌎            | 1              | 1              | 0              | 0              | 0              | 0              | 0              | 0                           |
| 𐌏            | 1              | 0              | 0              | 0              | 0              | 0              | 1              | 0                           |
| 𐌐            | 1              | 0              | 0              | 0              | 0              | 0              | 0              | 0                           |
| 𐌑            | 1              | 0              | 1              | 0              | 0              | 0              | 0              | 0                           |
| 𐌒            | 1              | 1              | 1              | 0              | 0              | 0              | 1              | 0                           |
| 𐌓            | 1              | 0              | 1              | 0              | 0              | 0              | 0              | 0                           |
| 𐌔            | 1              | 1              | 1              | 0              | 0              | 0              | 1              | 0                           |

| Euclidean Greek |                |                |                |                |                |                |                |                             |
|-----------------|----------------|----------------|----------------|----------------|----------------|----------------|----------------|-----------------------------|
| Script          | C <sub>1</sub> | S <sub>1</sub> | S <sub>2</sub> | S <sub>3</sub> | S <sub>4</sub> | C <sub>4</sub> | C <sub>2</sub> | C <sub>4</sub> <sup>3</sup> |
| A α             | 1              | 0              | 1              | 0              | 0              | 0              | 0              | 0                           |
| B β β           | 1              | 1              | 0              | 0              | 0              | 0              | 0              | 0                           |
| Γ γ             | 1              | 0              | 0              | 0              | 0              | 0              | 0              | 0                           |
| Δ δ             | 1              | 0              | 1              | 0              | 0              | 0              | 0              | 0                           |
| E ε ε           | 1              | 1              | 0              | 0              | 0              | 0              | 0              | 0                           |
| Z ζ             | 1              | 0              | 0              | 0              | 0              | 0              | 1              | 0                           |
| H η             | 1              | 1              | 1              | 0              | 0              | 0              | 1              | 0                           |
| Θ θ θ           | 1              | 1              | 1              | 0              | 0              | 0              | 1              | 0                           |
| I ι             | 1              | 1              | 1              | 0              | 0              | 0              | 1              | 0                           |
| K κ κ           | 1              | 1              | 0              | 0              | 0              | 0              | 0              | 0                           |
| Λ λ             | 1              | 0              | 1              | 0              | 0              | 0              | 0              | 0                           |
| M μ             | 1              | 0              | 1              | 0              | 0              | 0              | 0              | 0                           |
| N ν             | 1              | 0              | 0              | 0              | 0              | 0              | 1              | 0                           |
| Ξ ξ             | 1              | 1              | 1              | 0              | 0              | 0              | 1              | 0                           |
| O ο             | 1              | 1              | 1              | 0              | 0              | 0              | 1              | 0                           |
| Π π ω           | 1              | 0              | 1              | 0              | 0              | 0              | 0              | 0                           |
| P ρ ρ           | 1              | 0              | 0              | 0              | 0              | 0              | 0              | 0                           |
| Σ σ ς           | 1              | 1              | 0              | 0              | 0              | 0              | 0              | 0                           |
| T τ             | 1              | 0              | 1              | 0              | 0              | 0              | 0              | 0                           |
| Υ υ υ           | 1              | 0              | 1              | 0              | 0              | 0              | 0              | 0                           |
| Φ φ φ           | 1              | 1              | 1              | 0              | 0              | 0              | 1              | 0                           |
| Χ χ             | 1              | 1              | 1              | 1/0            | 1/0            | 1/0            | 1              | 1/0                         |
| Ψ ψ             | 1              | 0              | 1              | 0              | 0              | 0              | 0              | 0                           |
| Ω ω             | 1              | 0              | 1              | 0              | 0              | 0              | 0              | 0                           |

| Hebrew |                |                |                |                |                |                |                |                             |
|--------|----------------|----------------|----------------|----------------|----------------|----------------|----------------|-----------------------------|
| Script | C <sub>1</sub> | S <sub>1</sub> | S <sub>2</sub> | S <sub>3</sub> | S <sub>4</sub> | C <sub>4</sub> | C <sub>2</sub> | C <sub>4</sub> <sup>3</sup> |
| א      | 1              | 0              | 0              | 0              | 0              | 0              | 1              | 0                           |
| ב      | 1              | 0              | 0              | 0              | 0              | 0              | 0              | 0                           |
| ג      | 1              | 0              | 0              | 0              | 0              | 0              | 0              | 0                           |
| ד      | 1              | 0              | 0              | 0              | 0              | 0              | 0              | 0                           |
| ה      | 1              | 0              | 0              | 0              | 0              | 0              | 0              | 0                           |
| ו      | 1              | 1              | 1              | 0              | 0              | 0              | 1              | 0                           |
| ז      | 1              | 0              | 0              | 0              | 0              | 0              | 0              | 0                           |
| ח      | 1              | 0              | 0              | 0              | 0              | 0              | 0              | 0                           |
| ט      | 1              | 0              | 0              | 0              | 0              | 0              | 0              | 0                           |
| י      | 1              | 1              | 1              | 0              | 0              | 0              | 1              | 0                           |
| כ      | 1              | 1              | 0              | 0              | 0              | 0              | 0              | 0                           |
| ל      | 1              | 0              | 0              | 0              | 0              | 0              | 0              | 0                           |
| מ      | 1              | 0              | 0              | 0              | 0              | 0              | 0              | 0                           |
| נ      | 1              | 0              | 0              | 0              | 0              | 0              | 0              | 0                           |
| ס      | 1              | 1              | 1              | 0              | 0              | 0              | 1              | 0                           |
| ע      | 1              | 0              | 0              | 0              | 0              | 0              | 0              | 0                           |
| פ      | 1              | 0              | 0              | 0              | 0              | 0              | 0              | 0                           |
| צ      | 1              | 0              | 0              | 0              | 0              | 0              | 0              | 0                           |
| ק      | 1              | 0              | 0              | 0              | 0              | 0              | 0              | 0                           |
| ר      | 1              | 0              | 0              | 0              | 0              | 0              | 0              | 0                           |
| ש      | 1              | 0              | 0              | 0              | 0              | 0              | 0              | 0                           |
| ת      | 1              | 0              | 0              | 0              | 0              | 0              | 0              | 0                           |

| Proto-Hebrew |                |                |                |                |                |                |                |                             |
|--------------|----------------|----------------|----------------|----------------|----------------|----------------|----------------|-----------------------------|
| Script       | C <sub>1</sub> | S <sub>1</sub> | S <sub>2</sub> | S <sub>3</sub> | S <sub>4</sub> | C <sub>4</sub> | C <sub>2</sub> | C <sub>4</sub> <sup>3</sup> |
| 𐤀            | 1              | 1              | 0              | 0              | 0              | 0              | 0              | 0                           |
| 𐤁            | 1              | 0              | 0              | 0              | 0              | 0              | 0              | 0                           |
| 𐤂            | 1              | 0              | 0              | 0              | 0              | 0              | 0              | 0                           |
| 𐤃            | 1              | 0              | 0              | 0              | 0              | 0              | 0              | 0                           |
| 𐤄            | 1              | 0              | 0              | 0              | 0              | 0              | 0              | 0                           |
| 𐤅            | 1              | 0              | 0              | 0              | 0              | 0              | 0              | 0                           |
| 𐤆            | 1              | 1              | 1              | 0              | 0              | 0              | 1              | 0                           |
| 𐤇            | 1              | 1              | 1              | 0              | 0              | 0              | 1              | 0                           |
| 𐤈            | 1              | 1              | 1              | 1/0            | 1/0            | 1/0            | 1              | 1/0                         |
| 𐤉            | 1              | 0              | 0              | 0              | 0              | 0              | 0              | 0                           |
| 𐤊            | 1              | 0              | 0              | 0              | 0              | 0              | 0              | 0                           |
| 𐤋            | 1              | 0              | 0              | 0              | 0              | 0              | 0              | 0                           |
| 𐤌            | 1              | 0              | 0              | 0              | 0              | 0              | 0              | 0                           |
| 𐤍            | 1              | 0              | 0              | 0              | 0              | 0              | 0              | 0                           |
| 𐤎            | 1              | 0              | 0              | 0              | 0              | 0              | 0              | 0                           |
| 𐤏            | 1              | 1              | 1              | 0              | 0              | 0              | 1              | 0                           |
| 𐤐            | 1              | 1              | 1              | 0              | 0              | 0              | 1              | 0                           |
| 𐤑            | 1              | 0              | 0              | 0              | 0              | 0              | 0              | 0                           |
| 𐤒            | 1              | 0              | 0              | 0              | 0              | 0              | 0              | 0                           |
| 𐤓            | 1              | 0              | 1              | 0              | 0              | 0              | 0              | 0                           |
| 𐤔            | 1              | 0              | 0              | 0              | 0              | 0              | 0              | 0                           |
| 𐤕            | 1              | 0              | 1              | 0              | 0              | 0              | 0              | 0                           |
| 𐤖            | 1              | 1              | 1              | 1/0            | 1/0            | 1/0            | 1              | 1/0                         |

| Archaic Latin |                |                |                |                |                |                |                |                             |  |
|---------------|----------------|----------------|----------------|----------------|----------------|----------------|----------------|-----------------------------|--|
| Script        | C <sub>1</sub> | S <sub>1</sub> | S <sub>2</sub> | S <sub>3</sub> | S <sub>4</sub> | C <sub>4</sub> | C <sub>2</sub> | C <sub>4</sub> <sup>3</sup> |  |
| <b>R</b>      | 1              | 0              | 1              | 0              | 0              | 0              | 0              | 0                           |  |
| <b>B</b>      | 1              | 1              | 0              | 0              | 0              | 0              | 0              | 0                           |  |
| <b>C</b>      | 1              | 1              | 0              | 0              | 0              | 0              | 0              | 0                           |  |
| <b>D</b>      | 1              | 1              | 0              | 0              | 0              | 0              | 0              | 0                           |  |
| <b>E</b>      | 1              | 0              | 0              | 0              | 0              | 0              | 0              | 0                           |  |
| <b>F</b>      | 1              | 0              | 0              | 0              | 0              | 0              | 0              | 0                           |  |
| <b>H</b>      | 1              | 1              | 1              | 0              | 0              | 0              | 1              | 0                           |  |
| <b>I</b>      | 1              | 1              | 1              | 0              | 0              | 0              | 1              | 0                           |  |
| <b>k</b>      | 1              | 1              | 0              | 0              | 0              | 0              | 0              | 0                           |  |
| <b>L</b>      | 1              | 0              | 0              | 0              | 0              | 0              | 0              | 0                           |  |
| <b>W</b>      | 1              | 0              | 0              | 0              | 0              | 0              | 1              | 0                           |  |
| <b>W</b>      | 1              | 0              | 0              | 0              | 0              | 0              | 1              | 0                           |  |
| <b>O</b>      | 1              | 1              | 1              | 0              | 0              | 0              | 1              | 0                           |  |
| <b>P</b>      | 1              | 0              | 0              | 0              | 0              | 0              | 0              | 0                           |  |
| <b>Q</b>      | 1              | 0              | 1              | 0              | 0              | 0              | 0              | 0                           |  |
| <b>P</b>      | 1              | 0              | 0              | 0              | 0              | 0              | 0              | 0                           |  |
| <b>S</b>      | 1              | 0              | 0              | 0              | 0              | 0              | 1              | 0                           |  |
| <b>T</b>      | 1              | 0              | 0              | 0              | 0              | 0              | 0              | 0                           |  |
| <b>VY</b>     | 1              | 0              | 1              | 0              | 0              | 0              | 0              | 0                           |  |
| <b>X</b>      | 1              | 1              | 1              | 1/0            | 1/0            | 1/0            | 1              | 1/0                         |  |

| Classical Latin |                |                |                |                |                |                |                |                             |  |
|-----------------|----------------|----------------|----------------|----------------|----------------|----------------|----------------|-----------------------------|--|
| Script          | C <sub>1</sub> | S <sub>1</sub> | S <sub>2</sub> | S <sub>3</sub> | S <sub>4</sub> | C <sub>4</sub> | C <sub>2</sub> | C <sub>4</sub> <sup>3</sup> |  |
| <b>A</b>        | 1              | 0              | 1              | 0              | 0              | 0              | 0              | 0                           |  |
| <b>B</b>        | 1              | 1              | 0              | 0              | 0              | 0              | 0              | 0                           |  |
| <b>C</b>        | 1              | 1              | 0              | 0              | 0              | 0              | 0              | 0                           |  |
| <b>D</b>        | 1              | 1              | 0              | 0              | 0              | 0              | 0              | 0                           |  |
| <b>E</b>        | 1              | 1              | 0              | 0              | 0              | 0              | 0              | 0                           |  |
| <b>F</b>        | 1              | 0              | 0              | 0              | 0              | 0              | 0              | 0                           |  |
| <b>G</b>        | 1              | 0              | 0              | 0              | 0              | 0              | 0              | 0                           |  |
| <b>H</b>        | 1              | 1              | 1              | 0              | 0              | 0              | 1              | 0                           |  |
| <b>I</b>        | 1              | 1              | 1              | 0              | 0              | 0              | 1              | 0                           |  |
| <b>K</b>        | 1              | 1              | 0              | 0              | 0              | 0              | 0              | 0                           |  |
| <b>L</b>        | 1              | 0              | 0              | 0              | 0              | 0              | 0              | 0                           |  |
| <b>M</b>        | 1              | 0              | 1              | 0              | 0              | 0              | 0              | 0                           |  |
| <b>N</b>        | 1              | 0              | 0              | 0              | 0              | 0              | 1              | 0                           |  |
| <b>O</b>        | 1              | 1              | 1              | 0              | 0              | 0              | 1              | 0                           |  |
| <b>P</b>        | 1              | 0              | 0              | 0              | 0              | 0              | 0              | 0                           |  |
| <b>Q</b>        | 1              | 0              | 0              | 0              | 0              | 0              | 0              | 0                           |  |
| <b>R</b>        | 1              | 0              | 0              | 0              | 0              | 0              | 0              | 0                           |  |
| <b>S</b>        | 1              | 0              | 0              | 0              | 0              | 0              | 1              | 0                           |  |
| <b>T</b>        | 1              | 0              | 1              | 0              | 0              | 0              | 0              | 0                           |  |
| <b>V</b>        | 1              | 0              | 1              | 0              | 0              | 0              | 0              | 0                           |  |
| <b>X</b>        | 1              | 1              | 1              | 1/0            | 1/0            | 1/0            | 1              | 1/0                         |  |
| <b>Y</b>        | 1              | 0              | 1              | 0              | 0              | 0              | 0              | 0                           |  |
| <b>Z</b>        | 1              | 0              | 0              | 0              | 0              | 0              | 1              | 0                           |  |

| English |                |                |                |                |                |                |                |                             |
|---------|----------------|----------------|----------------|----------------|----------------|----------------|----------------|-----------------------------|
| Script  | C <sub>1</sub> | S <sub>1</sub> | S <sub>2</sub> | S <sub>3</sub> | S <sub>4</sub> | C <sub>4</sub> | C <sub>2</sub> | C <sub>4</sub> <sup>3</sup> |
| A       | 1              | 0              | 1              | 0              | 0              | 0              | 0              | 0                           |
| B       | 1              | 1              | 0              | 0              | 0              | 0              | 0              | 0                           |
| C       | 1              | 1              | 0              | 0              | 0              | 0              | 0              | 0                           |
| D       | 1              | 1              | 0              | 0              | 0              | 0              | 0              | 0                           |
| E       | 1              | 1              | 0              | 0              | 0              | 0              | 0              | 0                           |
| F       | 1              | 0              | 0              | 0              | 0              | 0              | 0              | 0                           |
| G       | 1              | 0              | 0              | 0              | 0              | 0              | 0              | 0                           |
| H       | 1              | 1              | 1              | 0              | 0              | 0              | 1              | 0                           |
| I       | 1              | 1              | 1              | 0              | 0              | 0              | 1              | 0                           |
| J       | 1              | 0              | 0              | 0              | 0              | 0              | 0              | 0                           |
| K       | 1              | 1              | 0              | 0              | 0              | 0              | 0              | 0                           |
| L       | 1              | 0              | 0              | 0              | 0              | 0              | 0              | 0                           |
| M       | 1              | 0              | 1              | 0              | 0              | 0              | 0              | 0                           |
| N       | 1              | 0              | 0              | 0              | 0              | 0              | 1              | 0                           |
| O       | 1              | 1              | 1              | 0              | 0              | 0              | 1              | 0                           |
| P       | 1              | 0              | 0              | 0              | 0              | 0              | 0              | 0                           |
| Q       | 1              | 0              | 0              | 0              | 0              | 0              | 0              | 0                           |
| R       | 1              | 0              | 0              | 0              | 0              | 0              | 0              | 0                           |
| S       | 1              | 0              | 1              | 0              | 0              | 0              | 0              | 0                           |
| T       | 1              | 0              | 1              | 0              | 0              | 0              | 0              | 0                           |
| U       | 1              | 0              | 1              | 0              | 0              | 0              | 0              | 0                           |
| V       | 1              | 0              | 1              | 0              | 0              | 0              | 0              | 0                           |
| W       | 1              | 0              | 1              | 0              | 0              | 0              | 0              | 0                           |
| X       | 1              | 1              | 1              | 1/0            | 1/0            | 1/0            | 1              | 1/0                         |
| Y       | 1              | 0              | 1              | 0              | 0              | 0              | 0              | 0                           |
| Z       | 1              | 0              | 0              | 0              | 0              | 0              | 1              | 0                           |
